# Supplementary material
Source: publisher figshare collection journal article supplement (https://acs.figshare.com/ndownloader/files/18064364)
Supplement: Supplementary file 1 [file 18064364]

# **Investigating the Structure of Self-Assembled Monolayers Related to Biological Cell Membranes**

Ahlam R. M. Alharbi<sup>1</sup>, Jakob Andersson<sup>1,3</sup>, Ingo Köper<sup>1</sup>, Gunther G. Andersson<sup>1,2\*</sup>

1 Flinders Institute for Nanoscale Science and Technology, College of Science and Engineering, Flinders University, Adelaide SA 5001, Australia

2 Flinders Microscopy and Microanalysis, College of Science and Engineering, Flinders University, Adelaide, SA 5001, Australia

3 Austrian Institute of Technology, Biosensor Technologies, 1210 Vienna, Austria

\*Corresponding author: Email [gunther.andersson@flinders.edu.au](mailto:gunther.andersson@flinders.edu.au)

## **Supplementary Material**

Number of pages: 2

Number of figures: 1

Number of tables: 1

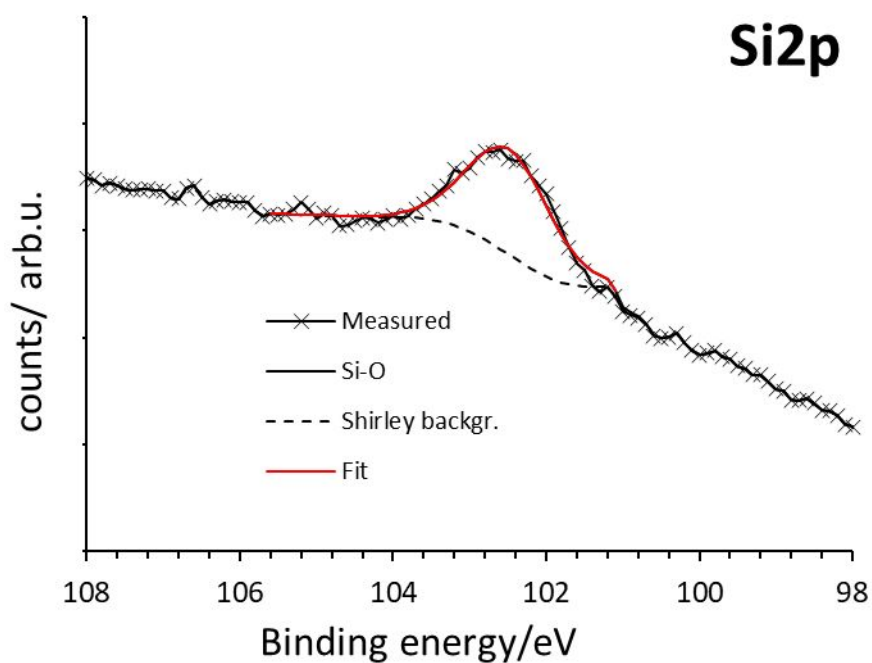

**Figure S1:** XPS high resolution spectrum of the Si2p region.

**Table S1:** Thickness of SAMs of DPhyTL and of SAMs of 0.16mg/ml of DPhyTL with 0.04mg/ml of ME for five different immersing times as determined with NICISS.

| Immersing time (mins) | 5             | 15            | 30            | 60            | 1440          |
|-----------------------|---------------|---------------|---------------|---------------|---------------|
| DPhyTL (nm)           | $2.3 \pm 0.4$ | $2.6 \pm 0.4$ | $2.7 \pm 0.4$ | $3.2 \pm 0.4$ | $3.9 \pm 0.4$ |
| DPhyTL with ME (nm)   | $3 \pm 0.4$   | $2.9 \pm 0.4$ | $3.4 \pm 0.4$ | $1.6 \pm 0.4$ | $1 \pm 0.4$   |
